# Supplementary material
Source: Springer Nature journal article supplement (https://www.springermedizin.de/resource/supplementary/12885_2010_2559_MOESM5_ESM.pdf/9462560)

Normal distant  
Normal adjacent  
CRC

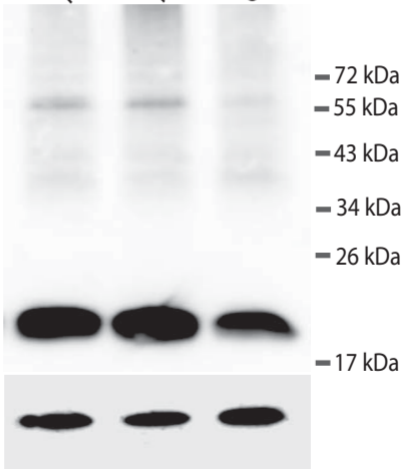

Supplement: MOESM5 [file 9462560]
